# Supplementary material for: Prediction of Potato Crop Yield Using Precision Agriculture Techniques
Source: PLoS One. 2016 Sep 9;11(9):e0162219. doi: 10.1371/journal.pone.0162219 (PMC5017787; doi:10.1371/journal.pone.0162219)
Supplement: S1 Table — (XLSX) [file pone.0162219.s003.xlsx]

## Sheet: Pivot 67-S Model
Points	Coordinates		ALT	CNDVI	CSAVI	NDVI				SAVI				SENTINEL (11 FEB.)		YIELD (TON/Ha)	TYPE
	LON	LAT				2016-01-26	2016-02-11	2016-02-27	2016-03-14	2016-01-26	2016-02-11	2016-02-27	2016-03-14	NDVI	SAVI
1	44ｰ 54' 56.335" E	19ｰ 57' 47.752" N	742	2.19524	1.60142	0.410363	0.62605	0.574849	0.583974	0.253825	0.441071	0.428386	0.478132	0.764937	0.514668	42	P
3	44ｰ 54' 52.349" E	19ｰ 57' 47.697" N	741.23	2.16671	1.5499	0.437707	0.608538	0.565666	0.554795	0.267021	0.423062	0.413835	0.445979	0.800995	0.520297	41.17	P
2	44ｰ 54' 52.487" E	19ｰ 57' 46.158" N	741.76	2.39038	1.74731	0.469096	0.683135	0.614301	0.623842	0.287099	0.485692	0.461287	0.51323	0.858129	0.587707	45.3	P
5	44ｰ 54' 56.087" E	19ｰ 57' 41.431" N	737.44	1.97494	1.40018	0.365068	0.555281	0.527149	0.527437	0.221283	0.380974	0.380954	0.416972	0.529047	0.346387	9.2	P
6	44ｰ 54' 54.466" E	19ｰ 57' 36.758" N	735.15	1.59911	1.17552	0.189456	0.355808	0.469992	0.583849	0.114091	0.240444	0.330082	0.490903	0.311701	0.205295	6.43	S
7	44ｰ 54' 53.146" E	19ｰ 57' 39.672" N	734.3	2.29737	1.65485	0.439995	0.6692	0.596763	0.59141	0.262473	0.468017	0.439368	0.484996	0.800867	0.527699	43.2	P
9	44ｰ 54' 50.645" E	19ｰ 57' 41.046" N	743.04	2.41911	1.74044	0.483459	0.701385	0.615564	0.618703	0.28965	0.495257	0.456453	0.499075	0.856104	0.569863	42.57	P
28	44ｰ 54' 50.645" E	19ｰ 57' 43.767" N	731.88	2.24184	1.61892	0.4101	0.622669	0.598896	0.610173	0.248036	0.430226	0.442683	0.497971	0.695273	0.44947	28.1	P
29	44ｰ 54' 46.413" E	19ｰ 57' 42.503" N	735.5	2.54643	1.85655	0.577868	0.7353	0.636911	0.596348	0.357733	0.539404	0.479851	0.479565	0.8908	0.622342	48.45	P
30	44ｰ 54' 47.485" E	19ｰ 57' 40.496" N	738.29	2.48848	1.79904	0.524421	0.720723	0.627224	0.616114	0.314645	0.517374	0.46672	0.500298	0.882036	0.594981	35.45	P
10	44ｰ 54' 52.377" E	19ｰ 57' 33.928" N	739.19	1.33884	0.991999	0.181448	0.293727	0.396305	0.467362	0.11104	0.200209	0.281703	0.399045	0.34713	0.218808	27.6	S
11	44ｰ 54' 49.354" E	19ｰ 57' 31.921" N	739.99	1.31491	0.987577	0.163981	0.294823	0.39698	0.459127	0.10193	0.203678	0.285206	0.396761	0.346747	0.218706	27.95	S
12	44ｰ 54' 48.309" E	19ｰ 57' 34.175" N	739.5	1.49538	1.10083	0.207193	0.311826	0.431003	0.545357	0.12186	0.214989	0.299794	0.464183	0.212726	0.147646	28.18	S
22	44ｰ 54' 46.908" E	19ｰ 57' 37.116" N	738.88	2.23812	1.61286	0.415593	0.637204	0.593181	0.592143	0.247564	0.440891	0.434124	0.490278	0.794172	0.509838	47.01	P
21	44ｰ 54' 44.407" E	19ｰ 57' 38.462" N	739.05	2.40452	1.75884	0.458011	0.694286	0.62511	0.627107	0.276495	0.492985	0.468175	0.521182	0.844949	0.560156	38.97	P
19	44ｰ 54' 43.087" E	19ｰ 57' 40.469" N	740.31	2.57566	1.88287	0.591776	0.738299	0.639675	0.605913	0.365631	0.54432	0.48219	0.490729	0.886245	0.623233	45.55	P
18	44ｰ 54' 39.899" E	19ｰ 57' 41.733" N	741.55	2.56808	1.91628	0.539065	0.728121	0.648817	0.652081	0.331041	0.539548	0.497674	0.548017	0.877092	0.6261	47.39	P
17	44ｰ 54' 38.965" E	19ｰ 57' 39.782" N	741.83	2.57214	1.89763	0.560831	0.735887	0.644224	0.631193	0.343208	0.54434	0.489378	0.520701	0.891486	0.645296	40.53	P
20	44ｰ 54' 41.329" E	19ｰ 57' 38.353" N	740.96	2.39817	1.75523	0.441432	0.690743	0.626923	0.639074	0.265652	0.48644	0.469815	0.533318	0.875812	0.596231	42.88	P
23	44ｰ 54' 43.555" E	19ｰ 57' 35.054" N	738.16	2.18401	1.58392	0.374054	0.621276	0.586443	0.602239	0.226531	0.425229	0.430204	0.501955	0.765114	0.490958	33.37	P
24	44ｰ 54' 44.956" E	19ｰ 57' 31.537" N	737.85	1.46481	1.08287	0.172358	0.304989	0.421316	0.566142	0.10618	0.205132	0.294215	0.477338	0.307692	0.197621	21.32	S
16	44ｰ 54' 39.899" E	19ｰ 57' 36.786" N	743.74	2.22782	1.62994	0.373583	0.636826	0.59923	0.618184	0.22847	0.438603	0.444221	0.51864	0.737073	0.465493	29.32	P
15	44ｰ 54' 36.986" E	19ｰ 57' 37.610" N	742.42	2.37636	1.73343	0.44333	0.679164	0.622977	0.630892	0.262075	0.47935	0.465751	0.526256	0.878589	0.608047	34.3	P
14	44ｰ 54' 34.375" E	19ｰ 57' 38.600" N	742.44	2.47451	1.83496	0.514082	0.702436	0.626799	0.631195	0.31643	0.513872	0.473997	0.530656	0.868786	0.614831	42.66	P
49	44ｰ 54' 31.535" E	19ｰ 57' 37.064" N	738.23	2.27727	1.68191	0.454348	0.652259	0.588014	0.582653	0.28106	0.473168	0.440975	0.486706	0.705629	0.482702	37.14	P
51	44ｰ 54' 34.105" E	19ｰ 57' 34.323" N	737.53	2.37091	1.73989	0.448337	0.698394	0.608919	0.615257	0.270673	0.500271	0.458527	0.510413	0.839548	0.565557	45.5	P
54	44ｰ 54' 37.232" E	19ｰ 57' 35.523" N	739.28	2.22732	1.62636	0.389237	0.636987	0.591814	0.609278	0.235576	0.442487	0.437449	0.510849	0.83194	0.559977	45.73	P
60	44ｰ 54' 42.971" E	19ｰ 57' 30.426" N	743.89	1.50195	1.11447	0.18237	0.329103	0.434788	0.555683	0.113044	0.224222	0.30605	0.471154	0.326567	0.21288	24.63	S
46	44ｰ 54' 45.327" E	19ｰ 57' 36.294" N	736.25	2.28591	1.65721	0.416451	0.654666	0.602433	0.61236	0.249441	0.454678	0.444123	0.508962	0.770939	0.49462	35.94	P
35	44ｰ 54' 55.649" E	19ｰ 57' 38.435" N	734.45	1.45294	1.0816	0.240612	0.318012	0.394884	0.499434	0.146987	0.227306	0.280194	0.427116	0.528345	0.345424	0	P
36	44ｰ 54' 53.593" E	19ｰ 57' 41.305" N	734.4	2.17967	1.55358	0.406216	0.611213	0.576787	0.585452	0.243723	0.420587	0.421771	0.467498	0.700994	0.448503	44.95	P
37	44ｰ 54' 52.351" E	19ｰ 57' 43.146" N	734.51	2.27253	1.63096	0.423872	0.643384	0.594462	0.610806	0.254829	0.443537	0.437229	0.49536	0.738738	0.476635	43.14	P
38	44ｰ 54' 49.524" E	19ｰ 57' 46.187" N	733.83	2.34096	1.6953	0.45624	0.662337	0.610793	0.611586	0.277574	0.463557	0.455153	0.499019	0.820812	0.542617	34.92	P
32	44ｰ 54' 53.936" E	19ｰ 57' 46.016" N	737.92	2.10829	1.51756	0.396297	0.57966	0.566748	0.56558	0.240735	0.404133	0.41659	0.456096	0.581442	0.383447	19.89	P
33	44ｰ 54' 55.477" E	19ｰ 57' 44.174" N	736.2	2.19704	1.57155	0.423734	0.634316	0.567124	0.571865	0.257384	0.440884	0.415739	0.457538	0.817898	0.533242	46.62	P
50	44ｰ 54' 34.576" E	19ｰ 57' 37.193" N	737.32	2.25383	1.65966	0.419618	0.621987	0.60152	0.610703	0.253712	0.44141	0.448636	0.5159	0.732205	0.489354	38.79	P
42	44ｰ 54' 48.625" E	19ｰ 57' 38.521" N	737.12	2.41586	1.74843	0.481432	0.699172	0.618872	0.61638	0.287475	0.495207	0.459077	0.506666	0.884698	0.602913	45.58	P
45	44ｰ 54' 47.639" E	19ｰ 57' 35.480" N	737.31	2.12138	1.53376	0.39204	0.600789	0.568345	0.560208	0.233029	0.419761	0.41471	0.466258	0.790318	0.507209	32.13	P
48	44ｰ 54' 46.397" E	19ｰ 57' 30.897" N	736.81	1.33992	0.995234	0.169593	0.303233	0.395537	0.471556	0.105289	0.208814	0.279241	0.401889	0.321605	0.203172	27.24	S
59	44ｰ 54' 38.388" E	19ｰ 57' 30.811" N	740.71	1.29055	0.976747	0.220877	0.337668	0.367182	0.364817	0.14687	0.24051	0.271499	0.317867	0.383687	0.249007	11.89	P
53	44ｰ 54' 36.504" E	19ｰ 57' 33.295" N	738.48	1.85345	1.34288	0.316851	0.511909	0.5072	0.517488	0.19338	0.348943	0.366145	0.434407	0.690178	0.444158	41.2	P
43	44ｰ 54' 50.680" E	19ｰ 57' 35.009" N	737.45	1.51266	1.11341	0.206436	0.314733	0.435642	0.555844	0.121286	0.215747	0.303636	0.472742	0.375634	0.233793	29.61	S
39	44ｰ 54' 47.939" E	19ｰ 57' 43.018" N	733.42	2.49826	1.82369	0.524187	0.715707	0.63161	0.626752	0.322737	0.518048	0.476017	0.506889	0.864161	0.588068	43.35	P
52	44ｰ 54' 34.405" E	19ｰ 57' 32.482" N	738.27	1.81703	1.35174	0.331166	0.523699	0.491114	0.471052	0.208972	0.372015	0.368217	0.402536	0.705867	0.470905	29.42	P
58	44ｰ 54' 40.958" E	19ｰ 57' 33.852" N	742.65	1.82403	1.33358	0.28685	0.478235	0.515731	0.543209	0.176299	0.32373	0.37237	0.461177	0.63404	0.403088	8.13	P

## Sheet: Trends (67-S)
		(1)	(2)	(3)	(4)	(5)	(6)	(7)	(8)	(9)	(10)	(11)
YIELD	(1)
CNDVI	(2)	0.5059
CSAVI	(3)	0.5069	0.9957
NDVI-26-JAN	(4)	0.4841	0.9474	0.9486
NDVI-11-FEB	(5)	0.5046	0.981	0.9734	0.9408
NDVI-27-FEB	(6)	0.4887	0.9867	0.9791	0.8922	0.9649
NDVI-14-MAR	(7)	0.3424	0.704	0.703	0.5255	0.5964	0.7471
SAVI-26-JAN	(8)	0.4734	0.9303	0.935	0.9971	0.9276	0.8703	0.493
SAVI-11-FEB	(9)	0.5079	0.9806	0.9813	0.9653	0.9931	0.9519	0.5829	0.9567
SAVI-27-FEB	(10)	0.4953	0.9902	0.9901	0.9153	0.9758	0.9938	0.7083	0.899	0.9717
SAVI-14-MAR	(11)	0.2908	0.583	0.5967	0.4035	0.4768	0.6328	0.9589	0.3754	0.4704	0.6023

## Sheet: Pivot 67-S Validation
Points	Coordinates		ALT	CNDVI	CSAVI	NDVI				SAVI				SENTINEL (11 FEB.)		YIELD (TON/Ha)	TYPE
	LON	LAT				2016-01-26	2016-02-11	2016-02-27	2016-03-14	2016-01-26	2016-02-11	2016-02-27	2016-03-14	NDVI	SAVI
4	44ｰ 54' 54.053" E	19ｰ 57' 44.069" N	739.51	37.8438	37.0463		37.7992				37.0283			34.9956	34.1606	42.84	P
27	44ｰ 54' 47.677" E	19ｰ 57' 44.701" N	736.02	43.2645	43.8943		42.2667				43.3166			40.7962	40.3338	38.4	P
8	44ｰ 54' 50.755" E	19ｰ 57' 37.995" N	746.83	39.6348	39.1214		40.1602				39.6364			39.1717	37.9873	26.11	P
25	44ｰ 54' 40.861" E	19ｰ 57' 31.482" N	739.78	18.8844	19.043		20.9024				21.2104			15.5721	16.5247	11.67	P
26	44ｰ 54' 39.020" E	19ｰ 57' 33.460" N	736.17	33.3303	33.2406		34.2585				33.0889			34.8532	33.4435	37.52	P
13	44ｰ 54' 33.166" E	19ｰ 57' 36.346" N	742.85	35.2199	35.4108		35.0232				34.6018			35.0409	35.1308	41.86	P
44	44ｰ 54' 50.980" E	19ｰ 57' 32.696" N	737.19	21.0811	20.9638		20.1443				19.9185			18.6397	18.6877	3.05	S
34	44ｰ 54' 56.248" E	19ｰ 57' 40.534" N	734.67	33.4553	32.1619		35.3304				34.6211			33.6794	32.5861	15.29	P
31	44ｰ 54' 54.749" E	19ｰ 57' 48.072" N	736.19	36.3335	36.0018		36.7833				36.3177			35.4942	34.4222	38.5	P
57	44ｰ 54' 41.772" E	19ｰ 57' 36.251" N	736.71	37.6612	37.6611		38.2695				37.3703			40.4329	40.0417	45.12	P
41	44ｰ 54' 49.353" E	19ｰ 57' 40.405" N	737.42	41.0754	40.4992		41.225				40.9489			39.9663	39.0459	34.7	P
56	44ｰ 54' 40.658" E	19ｰ 57' 40.362" N	736.71	44.5069	45.8499		43.2487				44.9787			42.9965	45.7124	53.16	P
55	44ｰ 54' 36.846" E	19ｰ 57' 39.206" N	738.21	44.9498	46.3893		42.6453				44.3865			41.96	44.4682	52.67	P
40	44ｰ 54' 45.284" E	19ｰ 57' 40.577" N	737.98	44.0361	44.1538		43.162				44.1242			43.1584	44.7438	51.09	P
47	44ｰ 54' 46.654" E	19ｰ 57' 33.210" N	736.81	20.2984	20.3135		19.1596				19.3344			16.4742	17.1465	28.97	S

## Sheet: Pivot 68-S Model 
Points	Coordinates		ALT	CNDVI	CSAVI	NDVI					SAVI					YIELD (TON/Ha)	TYPE
	LON	LAT				2016-01-26	2016-02-11	2016-02-27	2016-03-14	SN-11-Feb	2016-01-26	2016-02-11	2016-02-27	2016-03-14	SN-11-Feb
30	44ｰ 55' 17.364" E	19ｰ 57' 59.508" N	734.91	2.44693	1.78072	0.432437	0.688005	0.63831	0.688179	0.872363	0.25206	0.467044	0.63831	0.579946	0.552248	39.83	S
25	44ｰ 55' 15.993" E	19ｰ 57' 54.154" N	734.19	2.37424	1.73221	0.364758	0.66365	0.643179	0.702653	0.855458	0.209815	0.441078	0.643179	0.592386	0.510834	43.563	S
28	44ｰ 55' 15.137" E	19ｰ 57' 56.210" N	735.44	2.43261	1.73715	0.422652	0.696412	0.633384	0.680158	0.8873	0.237395	0.468754	0.633384	0.559238	0.554161	38.557	S
27	44ｰ 55' 12.224" E	19ｰ 57' 56.809" N	734.1	2.44827	1.76807	0.426951	0.692707	0.639204	0.689407	0.858782	0.247064	0.466941	0.639204	0.573225	0.521312	27.79	S
26	44ｰ 55' 13.209" E	19ｰ 57' 54.968" N	734.99	2.4674	1.77932	0.434074	0.704877	0.640422	0.688025	0.89062	0.245262	0.482112	0.640422	0.570812	0.56434	41.133	S
10	44ｰ 55' 12.267" E	19ｰ 57' 51.241" N	735.91	2.36221	1.71327	0.376812	0.664948	0.631823	0.68863	0.883047	0.215272	0.445457	0.631823	0.575353	0.565765	38.86	S
9	44ｰ 55' 11.325" E	19ｰ 57' 53.511" N	737.45	2.45611	1.76703	0.436213	0.699114	0.636944	0.683835	0.883113	0.24644	0.475902	0.636944	0.566566	0.550823	37.12	S
7	44ｰ 55' 8.198" E	19ｰ 57' 54.882" N	739.08	2.41902	1.77488	0.396101	0.683997	0.641123	0.6978	0.887119	0.239899	0.458946	0.641123	0.588475	0.555134	39.733	S
13	44ｰ 55' 8.198" E	19ｰ 57' 49.999" N	735.62	2.36232	1.7152	0.3823	0.667611	0.623616	0.688794	0.829724	0.219887	0.446418	0.623616	0.577569	0.501194	39.09	S
6	44ｰ 55' 7.170" E	19ｰ 57' 53.169" N	735.72	2.3571	1.72618	0.367295	0.660895	0.63222	0.696687	0.832364	0.226782	0.43542	0.63222	0.586392	0.49359	34.72	S
5	44ｰ 55' 5.286" E	19ｰ 57' 53.811" N	734.55	2.32769	1.70084	0.37642	0.64758	0.622626	0.681062	0.852791	0.227706	0.429794	0.622626	0.571334	0.530774	45.34	S
1	44ｰ 55' 3.016" E	19ｰ 57' 52.869" N	734.84	2.18115	1.58462	0.343868	0.592214	0.592385	0.652679	0.726596	0.209397	0.387226	0.592385	0.5418	0.427425	42.167	S
15	44ｰ 55' 9.954" E	19ｰ 57' 48.329" N	734.29	2.22517	1.61482	0.327542	0.612236	0.608013	0.677375	0.839239	0.189197	0.400703	0.608013	0.56567	0.515818	38.18	S
21	44ｰ 55' 13.595" E	19ｰ 57' 49.357" N	735.26	2.04493	1.47602	0.269774	0.520709	0.586016	0.668428	0.686846	0.158708	0.329603	0.586016	0.554824	0.398589	36.147	S
23	44ｰ 55' 16.379" E	19ｰ 57' 52.141" N	734.39	2.19537	1.58624	0.310865	0.582477	0.61539	0.686638	0.723753	0.180267	0.373832	0.61539	0.573234	0.411158	29.967	S
20	44ｰ 55' 17.492" E	19ｰ 57' 49.100" N	733.42	2.17292	1.5605	0.307316	0.585543	0.601656	0.678401	0.698938	0.175357	0.373664	0.601656	0.563579	0.40196	24.933	S
17	44ｰ 55' 13.081" E	19ｰ 57' 47.601" N	735.25	1.96114	1.41827	0.252899	0.489558	0.564114	0.654563	0.53851	0.149691	0.310756	0.564114	0.542304	0.310128	18.867	S
18	44ｰ 55' 14.837" E	19ｰ 57' 46.230" N	734.44	2.09043	1.51675	0.286018	0.556435	0.580302	0.667674	0.729863	0.167195	0.356999	0.580302	0.557873	0.429508	41.167	S
11	44ｰ 55' 10.768" E	19ｰ 57' 50.642" N	735.82	2.43861	1.77731	0.408146	0.6942	0.638283	0.697985	0.873453	0.232854	0.473041	0.638283	0.586454	0.54453	34.367	S
4	44ｰ 55' 5.971" E	19ｰ 57' 51.413" N	735.17	2.23691	1.62295	0.331187	0.612882	0.611015	0.681823	0.761904	0.201668	0.395158	0.611015	0.56868	0.445312	43.853	S
3	44ｰ 55' 5.114" E	19ｰ 57' 49.999" N	735.76	2.07421	1.49452	0.294501	0.549078	0.576297	0.654329	0.665791	0.183634	0.346821	0.576297	0.538271	0.378076	33.437	S
31	44ｰ 55' 27.343" E	19ｰ 58' 4.604" N	736.43	2.38564	1.73744	0.414137	0.680464	0.616886	0.674146	0.836368	0.24437	0.465886	0.616886	0.561779	0.522523	40.877	S
32	44ｰ 55' 27.771" E	19ｰ 58' 1.949" N	733.8	2.3766	1.73247	0.390444	0.671482	0.627661	0.687013	0.834989	0.226644	0.452817	0.627661	0.577126	0.526321	36.27	S
36	44ｰ 55' 26.572" E	19ｰ 58' 0.107" N	733.41	2.36113	1.71704	0.37365	0.66036	0.632925	0.694191	0.861932	0.215856	0.439995	0.632925	0.583377	0.536729	35.523	S
39	44ｰ 55' 21.775" E	19ｰ 58' 1.649" N	736.37	2.48896	1.80765	0.445058	0.702758	0.648804	0.692338	0.884687	0.258054	0.483321	0.648804	0.576363	0.566903	41.79	S
41	44ｰ 55' 18.734" E	19ｰ 58' 0.578" N	730.6	2.49564	1.80127	0.47025	0.702131	0.639754	0.683506	0.901095	0.275268	0.479247	0.639754	0.567584	0.57848	42.147	S
60	44ｰ 55' 20.276" E	19ｰ 57' 56.981" N	732.73	2.36135	1.72107	0.351085	0.660421	0.6452	0.704642	0.871623	0.202828	0.434547	0.6452	0.595467	0.533163	39.63	S
59	44ｰ 55' 19.719" E	19ｰ 57' 55.610" N	735.98	2.30767	1.67949	0.328718	0.637896	0.638635	0.702424	0.780569	0.190546	0.415899	0.638635	0.592062	0.462362	32.297	S
56	44ｰ 55' 19.976" E	19ｰ 57' 52.398" N	737.77	2.3745	1.7226	0.369843	0.669703	0.637885	0.69707	0.859261	0.210164	0.444814	0.637885	0.583898	0.52524	41.467	S
44	44ｰ 55' 19.719" E	19ｰ 57' 48.714" N	734.63	2.38338	1.73235	0.382141	0.679074	0.627154	0.695014	0.851809	0.213705	0.455581	0.627154	0.585615	0.529287	38.41	S
43	44ｰ 55' 18.734" E	19ｰ 57' 47.215" N	734.98	2.23681	1.61426	0.339392	0.622761	0.599097	0.675561	0.794188	0.192357	0.406509	0.599097	0.563677	0.473988	36.117	S
53	44ｰ 55' 24.045" E	19ｰ 57' 52.269" N	732.06	2.24609	1.63676	0.313269	0.62117	0.617417	0.694237	0.785889	0.181619	0.404255	0.617417	0.58457	0.465254	26.927	S
52	44ｰ 55' 23.531" E	19ｰ 57' 55.053" N	734.29	2.33463	1.70223	0.342844	0.652472	0.636605	0.702704	0.823903	0.196197	0.429057	0.636605	0.59383	0.491812	37.697	S
51	44ｰ 55' 22.803" E	19ｰ 57' 56.552" N	733.77	2.2139	1.59247	0.310061	0.595902	0.621448	0.686485	0.774984	0.180402	0.380734	0.621448	0.57097	0.452089	26.893	S
34	44ｰ 55' 27.258" E	19ｰ 57' 57.709" N	733.29	2.11732	1.52616	0.295713	0.554793	0.598093	0.668722	0.709428	0.174047	0.355782	0.598093	0.553773	0.418032	36.093	S
48	44ｰ 55' 26.444" E	19ｰ 57' 54.496" N	733.51	2.20721	1.6043	0.311886	0.603782	0.610417	0.681119	0.789987	0.181758	0.39273	0.610417	0.569928	0.469067	40.88	S
47	44ｰ 55' 25.844" E	19ｰ 57' 51.798" N	736.22	2.11623	1.5156	0.299066	0.578664	0.5817	0.6568	0.680672	0.171856	0.370486	0.5817	0.541356	0.390289	37.467	S
35	44ｰ 55' 24.773" E	19ｰ 57' 58.951" N	732.94	2.22376	1.6002	0.317577	0.601196	0.621287	0.683698	0.838689	0.183441	0.386082	0.621287	0.568672	0.494293	44.913	S
33	44ｰ 55' 28.799" E	19ｰ 57' 59.936" N	733.62	2.08585	1.48501	0.307047	0.565025	0.573671	0.640105	0.692708	0.179584	0.361653	0.573671	0.522798	0.395441	33.35	S
37	44ｰ 55' 24.773" E	19ｰ 58' 1.521" N	730.64	2.40391	1.74804	0.383811	0.673699	0.645341	0.701058	0.835542	0.22038	0.447982	0.645341	0.590334	0.50012	39.217	S
57	44ｰ 55' 18.606" E	19ｰ 57' 51.327" N	735.51	2.28322	1.64642	0.337096	0.630704	0.623213	0.692203	0.817684	0.19147	0.409561	0.623213	0.577471	0.486853	31.79	S
46	44ｰ 55' 24.902" E	19ｰ 57' 50.042" N	736.11	2.10465	1.52093	0.289133	0.568403	0.579668	0.667447	0.690087	0.169268	0.364822	0.579668	0.55376	0.403028	39.14	S
58	44ｰ 55' 18.349" E	19ｰ 57' 54.197" N	739.71	2.32351	1.69866	0.343207	0.63713	0.640341	0.702828	0.818847	0.199347	0.41799	0.640341	0.594988	0.486471	34.44	S
50	44ｰ 55' 24.773" E	19ｰ 57' 56.766" N	731.98	2.17999	1.57121	0.30719	0.581547	0.611027	0.680222	0.71585	0.179393	0.37287	0.611027	0.565446	0.411278	36.193	S
42	44ｰ 55' 19.976" E	19ｰ 57' 59.251" N	733.31	2.44579	1.76157	0.420135	0.687578	0.644366	0.693715	0.886239	0.24066	0.458449	0.644366	0.578393	0.545631	32.093	S

## Sheet: Trends (68-S)
		(1)	(2)	(3)	(4)	(5)	(6)	(7)	(8)	(9)	(10)	(11)
YIELD	(1)
CNDVI	(2)	0.1153
CSAVI	(3)	0.1243	0.99
NDVI-26-JAN	(4)	0.1247	0.8972	0.862
NDVI-11-FEB	(5)	0.1328	0.983	0.9715	0.8844
NDVI-27-FEB	(6)	0.0682	0.8554	0.8682	0.5996	0.7948
NDVI-14-MAR	(7)	0.0136	0.5236	0.5693	0.2281	0.4769	0.802
SAVI-26-JAN	(8)	0.1425	0.847	0.8267	0.9734	0.8294	0.5512	0.1914
SAVI-11-FEB	(9)	0.1358	0.9774	0.9664	0.9195	0.9911	0.7544	0.425	0.8657
SAVI-27-FEB	(10)	0.0682	0.8554	0.8682	0.5996	0.7948	1	0.802	0.5512	0.7544
SAVI-14-MAR	(11)	0.0169	0.4517	0.5132	0.1753	0.4124	0.7209	0.9734	0.1508	0.3663	0.7209

## Sheet: Pivot 68-S Validation 
Points	Coordinates		ALT	CNDVI	CSAVI	NDVI					SAVI					YIELD (TON/Ha)	TYPE
	LON	LAT				2016-01-26	2016-02-11	2016-02-27	2016-03-14	SN-11-Feb	2016-01-26	2016-02-11	2016-02-27	2016-03-14	SN-11-Feb
24	44ｰ 55' 14.066" E	19ｰ 57' 52.954" N	735.01				38.0567			39.3881	37.0692				39.4225	43.89	S
8	44ｰ 55' 10.083" E	19ｰ 57' 55.653" N	738.38				39.1673			39.7119	40.6268				40.0088	35.51	S
14	44ｰ 55' 7.213" E	19ｰ 57' 48.500" N	735.15				36.7193			37.2069	36.6353				37.4117	38.267	S
19	44ｰ 55' 16.421" E	19ｰ 57' 47.087" N	735.57				35.5834			35.7541	35.0709				35.4226	27.753	S
16	44ｰ 55' 11.753" E	19ｰ 57' 46.701" N	736.07				30.2675			26.0562	32.3843				27.9337	22.85	S
12	44ｰ 55' 9.183" E	19ｰ 57' 52.141" N	733.95				38.6692			38.1263	38.6859				37.9718	39.127	S
2	44ｰ 55' 4.472" E	19ｰ 57' 52.098" N	735.8				36.787			37.4496	37.5088				37.3044	37.81	S
22	44ｰ 55' 15.608" E	19ｰ 57' 50.599" N	735.48				33.1766			32.056	34.0415				32.3251	36.8	S
29	44ｰ 55' 17.621" E	19ｰ 57' 57.023" N	735.54				38.9341			39.2698	38.4697				38.9812	39.417	S
38	44ｰ 55' 24.816" E	19ｰ 58' 3.748" N	731.72				38.7719			38.9265	40.3145				39.7848	44.433	S
55	44ｰ 55' 21.647" E	19ｰ 57' 53.982" N	739.62				38.2217			38.4116	36.8537				38.3447	44.093	S
54	44ｰ 55' 22.032" E	19ｰ 57' 51.327" N	731.59				35.5338			33.5215	34.6966				33.2235	38.2	S
45	44ｰ 55' 22.803" E	19ｰ 57' 49.057" N	735.33				33.3066			31.324	33.9979				31.9455	20.56	S
49	44ｰ 55' 27.943" E	19ｰ 57' 55.310" N	734.71				33.6684			32.9116	34.0907				33.1055	6.11	S
40	44ｰ 55' 22.289" E	19ｰ 57' 59.336" N	735.41				37.7844			38.501	36.5003				38.2424	38.41	S

## Sheet: Pivot 44-S Model
Points	Coordinates		ALT	CNDVI	CSAVI	NDVI				SAVI				SENTINEL (11 FEB.)		YIELD (TON/Ha)	TYPE
	LON	LAT				2016-01-26	2016-02-11	2016-02-27	2016-03-14	2016-01-26	2016-02-11	2016-02-27	2016-03-14	NDVI	SAVI
23	44ｰ 52' 39.811" E	19ｰ 58' 1.709" N	742.94	2.4702	1.79688	0.535813	0.696668	0.558686	0.679033	0.324893	0.490577	0.406642	0.574766	0.837851	0.551515	44.193	P
22	44ｰ 52' 39.488" E	19ｰ 57' 57.844" N	745.28	2.32782	1.68621	0.391453	0.668387	0.615029	0.652953	0.227344	0.452147	0.456226	0.550494	0.858242	0.553153	48.59	P
14	44ｰ 52' 39.609" E	19ｰ 57' 54.098" N	741.5	2.34144	1.70473	0.38373	0.672963	0.626058	0.658684	0.221592	0.454646	0.469881	0.558608	0.83975	0.521448	45.357	P
2	44ｰ 52' 40.495" E	19ｰ 57' 48.098" N	744.26	2.36313	1.76979	0.374976	0.6945	0.62262	0.671033	0.220374	0.490431	0.481251	0.577729	0.854447	0.575982	44.457	P
5	44ｰ 52' 39.408" E	19ｰ 57' 50.796" N	745.02	2.18907	1.59027	0.335261	0.616016	0.604788	0.633002	0.195508	0.406131	0.450347	0.538285	0.751146	0.445593	39.897	P
4	44ｰ 52' 37.515" E	19ｰ 57' 50.957" N	743.31	2.23124	1.61054	0.349961	0.629008	0.608404	0.643863	0.201988	0.414079	0.451358	0.543109	0.815086	0.495479	47.577	P
6	44ｰ 52' 41.583" E	19ｰ 57' 52.004" N	744.9	2.2049	1.60021	0.335229	0.625127	0.605645	0.638902	0.194894	0.412597	0.451105	0.541614	0.79657	0.482104	38.457	P
11	44ｰ 52' 42.468" E	19ｰ 57' 53.696" N	742.84	2.28012	1.64077	0.365324	0.654679	0.616158	0.643956	0.208886	0.435031	0.457054	0.539793	0.833525	0.511347	39.537	P
7	44ｰ 52' 42.831" E	19ｰ 57' 50.434" N	743.69	2.34261	1.75814	0.363196	0.692757	0.623702	0.662956	0.215343	0.488944	0.481357	0.572492	0.863068	0.575538	45.533	P
30	44ｰ 52' 46.737" E	19ｰ 57' 58.448" N	740.55	2.20488	1.60762	0.361584	0.640449	0.588949	0.613895	0.21653	0.434542	0.437628	0.51892	0.756673	0.471959	27.6	P
28	44ｰ 52' 45.972" E	19ｰ 58' 1.508" N	740.55	2.15909	1.55969	0.364754	0.618082	0.573471	0.60278	0.216913	0.414549	0.420554	0.507674	0.759015	0.474816	40.82	P
27	44ｰ 52' 45.972" E	19ｰ 58' 3.602" N	739.57	2.26474	1.66332	0.388925	0.653903	0.589282	0.632625	0.232769	0.451373	0.44136	0.537821	0.837186	0.563203	47.593	P
16	44ｰ 52' 40.334" E	19ｰ 57' 55.911" N	744.76	2.37351	1.73819	0.401021	0.686961	0.626749	0.658779	0.23346	0.473289	0.472186	0.559248	0.846027	0.535491	44.033	P
26	44ｰ 52' 43.904" E	19ｰ 58' 2.448" N	743.28	2.20967	1.59712	0.390086	0.632391	0.580911	0.606283	0.233176	0.426949	0.425399	0.511592	0.782346	0.495027	30.9	P
12	44ｰ 52' 45.734" E	19ｰ 57' 55.815" N	743.79	2.14414	1.55179	0.336609	0.609341	0.584963	0.613225	0.199106	0.403755	0.432375	0.51655	0.728672	0.440544	38.533	P
29	44ｰ 52' 45.734" E	19ｰ 57' 59.736" N	741.06	2.30291	1.66094	0.41012	0.684106	0.608298	0.600387	0.240317	0.47107	0.451028	0.498526	0.853723	0.549657	36.813	P
18	44ｰ 52' 43.708" E	19ｰ 57' 57.775" N	744.22	2.29282	1.6386	0.416135	0.690685	0.611844	0.574157	0.239187	0.475976	0.452509	0.470927	0.848313	0.541585	35.96	P
17	44ｰ 52' 42.760" E	19ｰ 57' 55.880" N	743.79	2.35596	1.70123	0.410889	0.688844	0.625222	0.631002	0.235542	0.472951	0.466617	0.526115	0.849908	0.551413	43.65	P
3	44ｰ 52' 39.590" E	19ｰ 57' 48.953" N	742.06	2.33824	1.74213	0.36513	0.679958	0.628204	0.664943	0.21575	0.469999	0.482654	0.573722	0.842385	0.542028	43.227	P
9	44ｰ 52' 45.718" E	19ｰ 57' 52.954" N	742.84	2.36594	1.77248	0.389631	0.70295	0.621867	0.651493	0.230819	0.504236	0.478574	0.558847	0.83215	0.550424	42.803	P
20	44ｰ 52' 39.551" E	19ｰ 57' 59.841" N	742.84	2.45217	1.79925	0.447545	0.710167	0.628931	0.665531	0.262496	0.50184	0.472188	0.56272	0.886595	0.592783	49.743	P
31	44ｰ 52' 23.098" E	19ｰ 57' 52.367" N	744.16	2.26139	1.65772	0.393194	0.651597	0.581265	0.635335	0.236622	0.438862	0.438919	0.543311	0.818181	0.518931	38.233	P
33	44ｰ 52' 26.199" E	19ｰ 57' 50.112" N	740.62	2.34456	1.71161	0.416618	0.685337	0.60086	0.641747	0.240886	0.477374	0.45167	0.541673	0.861467	0.566082	48.74	P
35	44ｰ 52' 28.228" E	19ｰ 57' 48.885" N	741.48	2.20767	1.59735	0.354463	0.631939	0.587481	0.633789	0.206205	0.419531	0.436232	0.535384	0.806376	0.493846	41.3	P
36	44ｰ 52' 30.226" E	19ｰ 57' 46.930" N	740.66	2.18306	1.59322	0.325142	0.626793	0.592472	0.638655	0.191741	0.415483	0.44365	0.542345	0.760254	0.466556	45.283	P
37	44ｰ 52' 31.297" E	19ｰ 57' 48.021" N	738.51	2.05998	1.47718	0.323507	0.575295	0.56268	0.598496	0.188965	0.372913	0.411872	0.503426	0.674898	0.394987	39.03	P
38	44ｰ 52' 32.502" E	19ｰ 57' 47.026" N	741.51	2.24152	1.65464	0.348444	0.647474	0.602148	0.643453	0.205783	0.439541	0.456144	0.553167	0.800942	0.503485	34.2	P
39	44ｰ 52' 35.502" E	19ｰ 57' 46.165" N	743.03	2.2402	1.68177	0.357112	0.661691	0.60132	0.620075	0.214162	0.463567	0.465423	0.538618	0.814901	0.529801	40.053	P
40	44ｰ 52' 34.515" E	19ｰ 57' 47.840" N	744.61	2.25034	1.65005	0.343655	0.648607	0.611326	0.646748	0.200303	0.434927	0.461428	0.553394	0.804528	0.495994	37.533	P
41	44ｰ 52' 32.862" E	19ｰ 57' 48.979" N	745.95	2.17051	1.54763	0.344949	0.615324	0.588215	0.622017	0.196632	0.399834	0.431827	0.519331	0.802619	0.477182	29.81	P
42	44ｰ 52' 30.258" E	19ｰ 57' 49.887" N	750.16	2.23058	1.59969	0.373268	0.638886	0.592987	0.625437	0.214497	0.422949	0.436837	0.525407	0.800593	0.483512	34.667	P
43	44ｰ 52' 29.302" E	19ｰ 57' 52.000" N	744.46	2.33349	1.68505	0.399854	0.674573	0.608421	0.650635	0.226067	0.458834	0.452664	0.547481	0.879937	0.574028	37.86	P
44	44ｰ 52' 28.176" E	19ｰ 57' 52.962" N	743.17	2.37942	1.7379	0.420838	0.693208	0.613502	0.651875	0.243888	0.48093	0.460971	0.552112	0.861375	0.556264	50.267	P
45	44ｰ 52' 26.280" E	19ｰ 57' 52.729" N	744.43	2.27337	1.6438	0.39281	0.649294	0.592238	0.639022	0.230384	0.433475	0.43951	0.540434	0.826725	0.502379	38.16	P
46	44ｰ 52' 27.367" E	19ｰ 57' 54.702" N	745.09	2.28877	1.66101	0.406861	0.650069	0.59076	0.641078	0.240561	0.433909	0.441353	0.545188	0.834287	0.529645	39.84	P
48	44ｰ 52' 31.346" E	19ｰ 57' 53.048" N	743.55	2.35768	1.71204	0.399702	0.674939	0.620294	0.66274	0.229175	0.457725	0.464223	0.560919	0.862968	0.548628	62.667	P
50	44ｰ 52' 33.393" E	19ｰ 57' 51.103" N	741.88	2.30177	1.672	0.371798	0.658384	0.617234	0.654352	0.214422	0.440902	0.462026	0.554647	0.817821	0.508084	42.387	P
52	44ｰ 52' 35.406" E	19ｰ 57' 52.080" N	742.52	2.36232	1.718	0.393473	0.680984	0.62843	0.659437	0.225657	0.462926	0.472	0.557417	0.859226	0.536539	39.747	P
53	44ｰ 52' 33.649" E	19ｰ 57' 53.172" N	742.86	2.18531	1.56817	0.346004	0.606562	0.595489	0.637251	0.200041	0.394515	0.43699	0.536623	0.75414	0.436363	35.967	P
54	44ｰ 52' 34.507" E	19ｰ 57' 54.761" N	741.27	2.46381	1.80338	0.445045	0.709693	0.634163	0.674904	0.255895	0.496349	0.478365	0.572774	0.8952	0.603698	56.123	P
55	44ｰ 52' 36.494" E	19ｰ 57' 55.823" N	740.73	2.40033	1.75426	0.407728	0.6915	0.629131	0.671969	0.235755	0.475408	0.473175	0.569923	0.868961	0.545803	42.28	P
56	44ｰ 52' 36.665" E	19ｰ 57' 57.631" N	739.33	2.35443	1.72088	0.41947	0.674522	0.6074	0.653039	0.246821	0.466958	0.454316	0.552782	0.863528	0.557738	52.45	P
57	44ｰ 52' 34.584" E	19ｰ 57' 56.860" N	738.21	2.17305	1.60153	0.406369	0.610235	0.553993	0.602452	0.241652	0.4325	0.415752	0.511626	0.527538	0.343279	56.487	P
58	44ｰ 52' 32.271" E	19ｰ 57' 54.835" N	738.59	2.49496	1.83083	0.466428	0.722575	0.634643	0.671312	0.269389	0.51306	0.47945	0.568927	0.896477	0.611741	52.953	P
60	44ｰ 52' 30.438" E	19ｰ 57' 55.772" N	739.52	2.3578	1.71091	0.422577	0.673521	0.608778	0.652923	0.246171	0.456046	0.454224	0.55447	0.846243	0.515675	41.7	P

## Sheet: Trends (44-S)
		(1)	(2)	(3)	(4)	(5)	(6)	(7)	(8)	(9)	(10)	(11)
YIELD	(1)
CNDVI	(2)	0.2594
CSAVI	(3)	0.2812	0.9379
NDVI-26-JAN	(4)	0.1846	0.643	0.5169
NDVI-11-FEB	(5)	0.1742	0.9107	0.9035	0.5157
NDVI-27-FEB	(6)	0.086	0.438	0.4356	0.0188	0.4987
NDVI-14-MAR	(7)	0.2291	0.5573	0.5911	0.1498	0.3635	0.342
SAVI-26-JAN	(8)	0.1599	0.5702	0.4837	0.9758	0.4573	0.0022	0.1266
SAVI-11-FEB	(9)	0.2172	0.8411	0.9027	0.5336	0.9508	0.3743	0.2995	0.3778
SAVI-27-FEB	(10)	0.1091	0.4158	0.5037	0.0093	0.5172	0.9192	0.3639	0.0011	0.4465
SAVI-14-MAR	(11)	0.2086	0.4608	0.5612	0.0907	0.3089	0.2926	0.9572	0.0852	0.2778	0.3745

## Sheet: Pivot 44-S Validation
Points	Coordinates		ALT	CNDVI	CSAVI	NDVI				SAVI				SENTINEL (11 FEB.)		YIELD (TON/Ha)	TYPE
	LON	LAT				2016-01-26	2016-02-11	2016-02-27	2016-03-14	2016-01-26	2016-02-11	2016-02-27	2016-03-14	NDVI	SAVI
24	44ｰ 52' 41.623" E	19ｰ 58' 2.193" N	743.33	46.945	47.1114				44.6245		46.666			45.0497	46.9372	42.24	P
21	44ｰ 52' 37.757" E	19ｰ 57' 59.656" N	742.81	47.5302	47.3486				45.9229		46.5725			46.9098	47.0343	41.6	P
13	44ｰ 52' 37.435" E	19ｰ 57' 53.937" N	742.68	44.0401	43.6541				45.0444		42.7011			46.2527	43.5447	34	P
1	44ｰ 52' 37.555" E	19ｰ 57' 48.138" N	745.01	43.1664	45.0047				45.8455		43.7465			43.4511	43.4449	41.973	P
10	44ｰ 52' 44.401" E	19ｰ 57' 55.025" N	741.23	36.6894	36.0426				38.4575		37.1113			25.9541	29.3153	26.203	P
25	44ｰ 52' 43.636" E	19ｰ 58' 0.703" N	741.29	35.0065	34.6781				35.3681		36.2018			27.1947	31.5084	31.063	P
15	44ｰ 52' 38.441" E	19ｰ 57' 56.072" N	740.74	46.0795	45.8085				45.5438		44.7976			47.9365	45.9524	52.05	P
19	44ｰ 52' 41.703" E	19ｰ 57' 58.609" N	742.56	44.0069	43.9244				44.183		43.5199			45.7505	44.5313	35.933	P
8	44ｰ 52' 43.740" E	19ｰ 57' 50.979" N	743.53	45.7562	47.9459				46.1335		47.7164			46.8066	49.5226	51.1	P
32	44ｰ 52' 24.167" E	19ｰ 57' 51.011" N	742.45	41.1951	41.6668				40.4541		42.7499			40.6106	40.9512	50.683	P
34	44ｰ 52' 27.206" E	19ｰ 57' 47.973" N	742.22	37.5335	38.3597				39.7506		39.1685			37.119	38.0666	46.35	P
47	44ｰ 52' 30.309" E	19ｰ 57' 53.784" N	743.31	48.2061	48.1833				46.0198		47.5314			49.4444	49.6188	58	P
49	44ｰ 52' 32.369" E	19ｰ 57' 52.090" N	741.65	38.9101	38.3224				41.8426		37.7888			36.629	36.4388	43.877	P
51	44ｰ 52' 35.381" E	19ｰ 57' 49.830" N	740.74	38.6455	37.7956				41.2487		37.6316			36.5985	35.363	38.333	P
59	44ｰ 52' 32.391" E	19ｰ 57' 56.611" N	739.18	50.1658	49.8143				47.9162		48.2217			48.2901	48.7034	47.993	P

## Sheet: Zone Areas
LANDSAT-8																		SENTINEL-2
ZONE	67-S (PROCESSING)				67-S (SEED)				68-S				44-S					ZONE	67-S (PROCESSING)				67-S (SEED)				68-S				44-S
	PIXEL COUNT	ZONE AREA	ZONE AREA %	AVG. YIELD	PIXEL COUNT	ZONE AREA	ZONE AREA %	AVG. YIELD	PIXEL COUNT	ZONE AREA	ZONE AREA %	AVG. YIELD	PIXEL COUNT	ZONE AREA	ZONE AREA %	AVG. YIELD			PIXEL COUNT	ZONE AREA	ZONE AREA %	AVG. YIELD	PIXEL COUNT	ZONE AREA	ZONE AREA %	AVG. YIELD	PIXEL COUNT	ZONE AREA	ZONE AREA %	AVG. YIELD	PIXEL COUNT	ZONE AREA	ZONE AREA %	AVG. YIELD
V. HIGH	92	8.28	0.264368	43	31	2.79	0.659574	22	145	13.05	0.442073	39	61	5.49	0.201987	47		V. HIGH	921	9.21	0.335031	43	298	2.98	0.59127	21	1199	11.99	0.378233	40	481	4.81	0.180217	50
HIGH	126	11.34	0.362069	37					87	7.83	0.265244	36	99	8.91	0.327815	44		HIGH	1095	10.95	0.398327	37					757	7.57	0.238801	37	781	7.81	0.292619	45
MEDIUM	43	3.87	0.123563	30					63	5.67	0.192073	34	90	8.1	0.298013	40		MEDIUM	521	5.21	0.189523	29					619	6.19	0.195268	34	633	6.33	0.237167	41
LOW	66	5.94	0.189655	21	16	1.44	0.340426	12	30	2.7	0.0914634	28	41	3.69	0.135762	33		LOW	172	1.72	0.0625682	21	206	2.06	0.40873	14	432	4.32	0.136278	31	494	4.94	0.185088	37
V. LOW	21	1.89	0.0603448	10					3	0.27	0.00914634	22	11	0.99	0.0364238	20		V. LOW	40	0.4	0.0145507	14					163	1.63	0.0514196	24	280	2.8	0.104908	19
TOTAL		31.32				4.23				29.52				27.18				TOTAL		27.49				5.04				31.7				26.69
LANDSAT-8								SENTINEL-2								LANDSAT-8					SENTINEL-2
NDVI																SAVI
			67-S	68-S			44-S	67-S	68-S		68-S	44-S					67-S	68-S		44-S	67-S	68-S	44-S	44-S
Image date			R2	R2	R2	R2	R2	R2	R2	R2	R2	R2				Image date	R2	R2	R2	R2	R2	R2	R2	R2
2016-01-26			0.48	0.1247			0.1846									2016-01-26	0.4734	0.1425		0.1599
2016-02-11			0.5	0.1328			0.1742	0.49			0.22	0.41				2016-02-11	0.5079	0.1358		0.2172	0.5	0.22		0.42
2016-02-27			0.48	0.0682			0.086									2016-02-27	0.4953	0.0682		0.1091
2016-03-14			0.34	0.0136			0.2291									2016-12-14	0.2908	0.0169		0.2086
							Zone Name	Pixels No.			Minimum	Maximum	Mean	Std. Deviation	Mean	Std. Deviation
							V.High_Yield Zone (L8)	92	39.95	46.91	39.95	46.91			43.0197	2.01809
							High_Yield Zone (L8)	126	27.06	39.99	27.06	39.99			37.0084	2.03278
							Medium_Yield Zone (L8)	43	25.87	33.67	25.87	33.67			30.374	2.35259
							Low_Yield Zone (L8)	66	15.94	25.82	15.94	25.82			21.5262	2.64344
							V.Low_Yield Zone (L8)	21	4.59	15.85	4.59	15.85			10.2162	3.39875
							V.High_Yield Zone (SN2)	921	39.65	46.21	39.65	46.21			42.5084	1.7824
							High_Yield Zone (SN2)	1095	33.36	39.64	33.36	39.64			36.8688	1.70145
							Medium_Yield Zone (SN2)	521	25.28	33.34	25.28	33.34			29.9253	2.26742
							Low_Yield Zone (SN2)	172	17.64	27.53	17.64	27.53			22.2112	2.20371
							V.Low_Yield Zone (SN2)	40	10.96	17.64	10.96	17.64			14.2975	1.96032
							Actual Yield (t/ha)	45	0	48.45	0	48.45			34.1044	12.2966
							Valid N (listwise)	21

[truncated: 1 more sheets: Statistics]
